# Supplementary material
Source: PubMed Central journal article supplement (PMC3307895)
Supplement: NIHMS359433-supplement-1_si_001.pdf [file NIHMS359433-supplement-1_si_001.pdf]

# SUPPORTING INFORMATION

## Kinetic Analysis of the Bypass of a Bulky DNA Lesion Catalyzed by Human Y-family DNA Polymerases

*Shanen M. Sherrer, Laura E. Sanman, Cynthia X. Xia, Eric R. Bolin, Chanchal K. Malik, Georgia Eftimiopoulos, Ashis K. Basu, and Zucui Suo\**

| <b>Table of Contents for Supporting Information</b> |                                                                                                        |             |
|-----------------------------------------------------|--------------------------------------------------------------------------------------------------------|-------------|
| <b>Figure/Table</b>                                 | <b>Title</b>                                                                                           | <b>Page</b> |
| Supplementary Figure 1                              | Chemical structure of dG <sup>AP</sup> .                                                               | S-2         |
| Supplementary Figure 2                              | The percentage of dG <sup>AP</sup> bypass catalyzed by human Y-family DNA polymerases.                 | S-3         |
| Supplementary Figure 3                              | EMSA for the binding of hPol $\eta$ to 5'-[ <sup>32</sup> P]-labeled DNA.                              | S-4         |
| Supplementary Figure 4                              | Single-turnover kinetics of correct dCTP incorporation onto 20-mer/26-mer catalyzed by hPol $\kappa$ . | S-5         |
| Supplementary Figure 5                              | Single-turnover kinetics of correct dCTP incorporation onto 20-mer/26-mer catalyzed by hPol $\iota$ .  | S-6         |
| Supplementary Figure 6                              | Single-turnover kinetics of correct dCTP incorporation onto 20-mer/26-mer catalyzed by hRev1.          | S-7         |
| Supplementary Figure 7                              | Effectiveness of a DNA trap.                                                                           | S-8         |
| Supplementary Table 1                               | Kinetic parameters of nucleotide incorporation onto undamaged DNA catalyzed by hPol $\eta$ .           | S-9         |
| Supplementary Table 2                               | Kinetic parameters of nucleotide incorporation onto undamaged DNA catalyzed by hPol $\kappa$ .         | S-10        |
| Supplementary Table 3                               | Kinetic parameters of nucleotide incorporation onto undamaged DNA catalyzed by hPol $\iota$ .          | S-11        |
| Supplementary Table 4                               | Kinetic parameters of nucleotide incorporation onto undamaged DNA catalyzed by hRev1.                  | S-12        |
| Supplementary Table 5                               | Biphasic kinetic parameters of correct nucleotide incorporations catalyzed by hPol $\eta$ .            | S-13        |

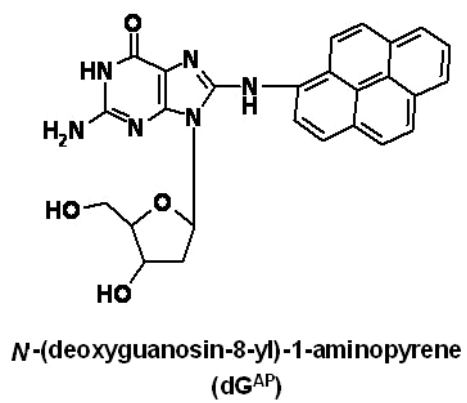

**Supplementary Figure 1.** Chemical structure of dG<sup>AP</sup>.

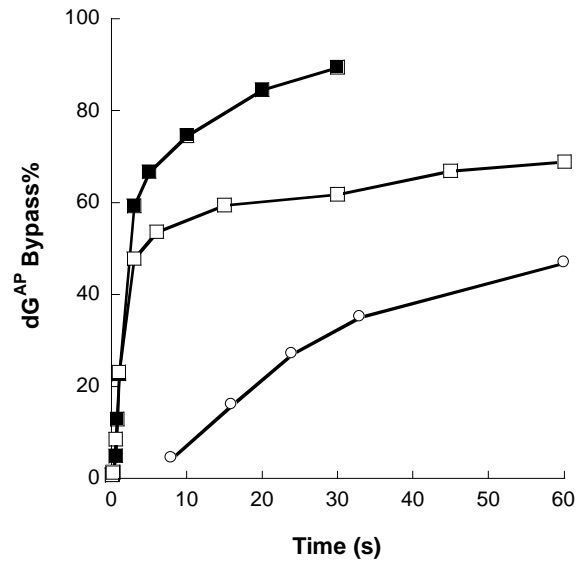

**Supplementary Figure 2.** The percentage of  $dG^{AP}$  bypass catalyzed by human Y-family DNA polymerases. The quantification of gel images for the running start assays (Figure 1) is for hPol $\eta$  (■), hPol $\kappa$  (□), and hPol $\iota$  (○).

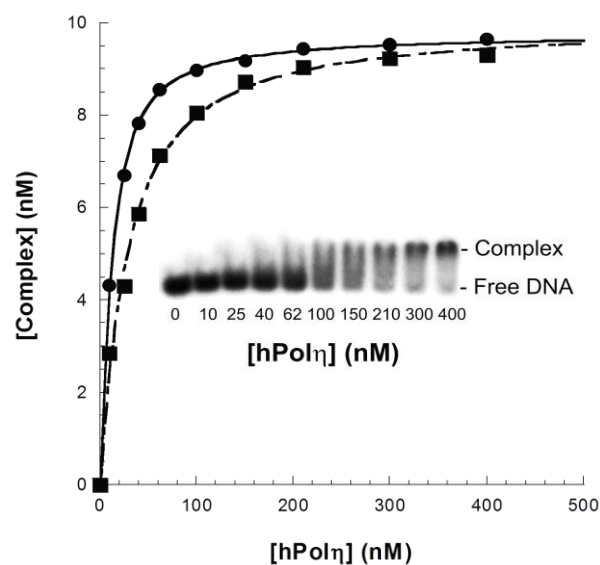

**Supplementary Figure 3.** EMSA for the binding of hPol $\eta$  to 5'-[ $^{32}$ P]-labeled DNA. The inset is the gel image for the binding of hPol $\eta$  to 20-mer/26-mer-dG<sup>AP</sup>. The plots for 20-mer/26-mer (■) and 20-mer/26-mer-dG<sup>AP</sup> (●) were fit to Equation 2 to yield  $K_{d, \text{DNA}}$  of  $23 \pm 2$  nM for 20-mer/26-mer and  $7.9 \pm 0.3$  nM for 20-mer/26-mer-dG<sup>AP</sup>.

A.

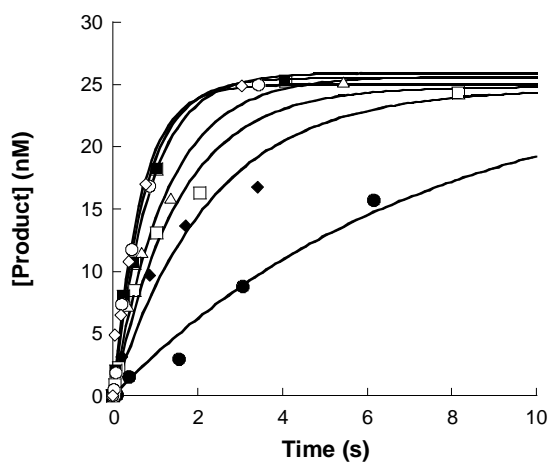

B.

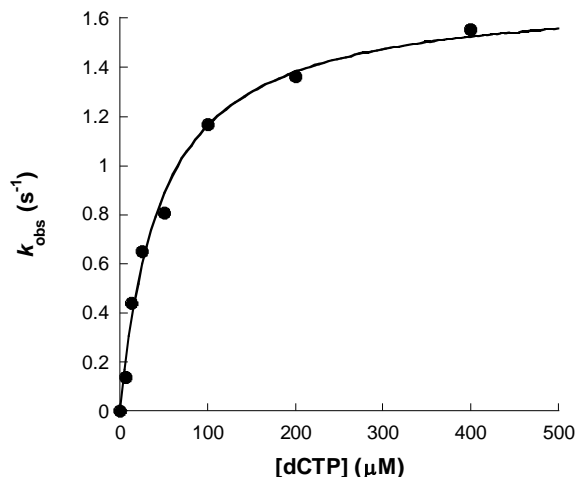

**Supplementary Figure 4.** Single-turnover kinetics of correct dCTP incorporation onto 20-mer/26-mer catalyzed by hPolk. (A) A preincubated solution of hPolk (300 nM) and radiolabeled 20-mer/26-mer (30 nM) at 37 °C were rapidly mixed with increasing concentrations of dCTP (6.25  $\mu\text{M}$ ,  $\bullet$ ; 12.5  $\mu\text{M}$ ,  $\blacklozenge$ ; 25  $\mu\text{M}$ ,  $\square$ ; 50  $\mu\text{M}$ ,  $\triangle$ ; 100  $\mu\text{M}$ ,  $\blacksquare$ ; 200  $\mu\text{M}$ ,  $\circ$ ; 400  $\mu\text{M}$ ,  $\diamond$ ) for various time intervals. Each time course corresponding to each dCTP concentration was fit to a single exponential curve to obtain  $k_{\text{obs}}$ . (B) Plot of calculated  $k_{\text{obs}}$  as a function of dCTP concentration, which was fit to a hyperbola curve to  $K_{d, \text{dCTP}}$  ( $46 \pm 6 \mu\text{M}$ ) and  $k_p$  ( $1.7 \pm 0.1 \text{ s}^{-1}$ ).

A.

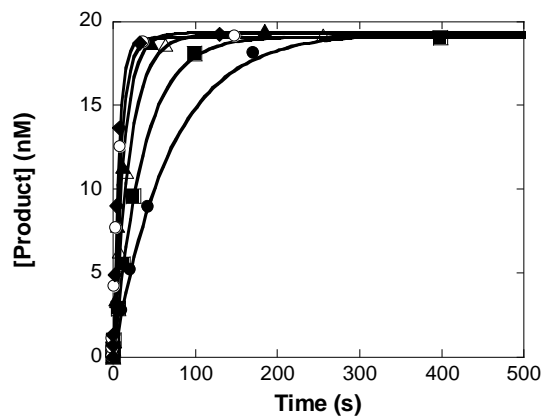

B.

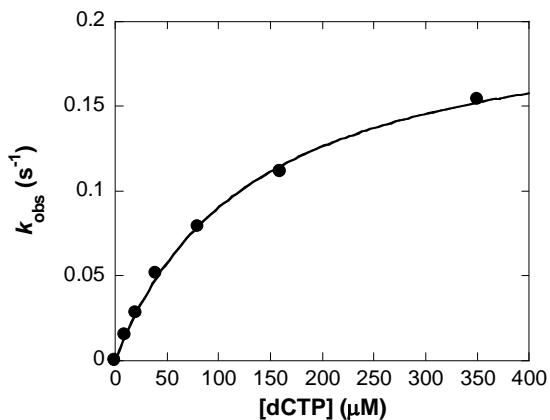

**Supplementary Figure 5.** Single-turnover kinetics of correct dCTP incorporation onto 20-mer/26-mer catalyzed by hPol $\iota$ . (A) A preincubated solution of hPol $\iota$  (130 nM) and radiolabeled 20-mer/26-mer (20 nM) at 37 °C were rapidly mixed with increasing concentrations of dCTP (10  $\mu$ M,  $\bullet$ ; 20  $\mu$ M,  $\blacksquare$ ; 40  $\mu$ M,  $\Delta$ ; 80  $\mu$ M,  $\blacktriangle$ ; 160  $\mu$ M,  $\circ$ ; 350  $\mu$ M,  $\blacklozenge$ ) for various time intervals. Each time course corresponding to each dCTP concentration was fit to a single exponential curve to obtain  $k_{\text{obs}}$ . (B) Plot of calculated  $k_{\text{obs}}$  as a function of dCTP concentration, which was fit to a hyperbola curve to  $K_{d, \text{dCTP}}$  ( $133 \pm 8 \mu\text{M}$ ) and  $k_p$  ( $0.21 \pm 0.01 \text{ s}^{-1}$ ).

A.

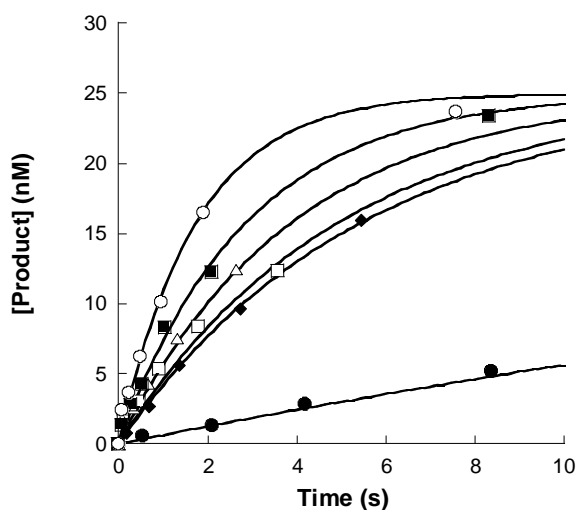

B.

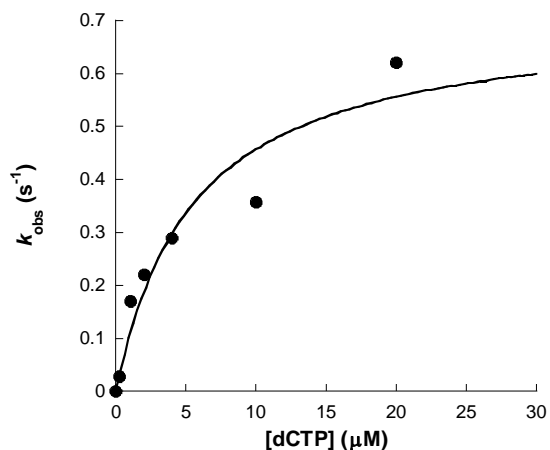

**Supplementary Figure 6.** Single-turnover kinetics of correct dCTP incorporation onto 20-mer/26-mer catalyzed by hRev1. (A) A preincubated solution of hRev1 (120 nM) and radiolabeled 20-mer/26-mer (30 nM) at 37 °C were rapidly mixed with increasing concentrations of dCTP (0.25  $\mu M$ , ●; 1  $\mu M$ , ◆; 2  $\mu M$ , □; 4  $\mu M$ , Δ; 10  $\mu M$ , ■; 20  $\mu M$ , ○) for various time intervals. Each time course corresponding to each dCTP concentration was fit to a single exponential curve to obtain  $k_{obs}$ . (B) Plot of calculated  $k_{obs}$  as a function of dCTP concentration, which was fit to a hyperbola curve to  $K_{d, dCTP}$  ( $5.4 \pm 1.2 \mu M$ ) and  $k_p$  ( $0.78 \pm 0.07 s^{-1}$ ).

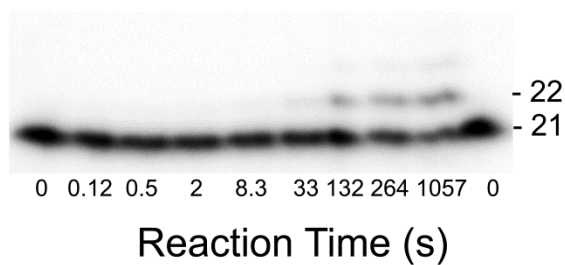

**Supplementary Figure 7.** Effectiveness of a DNA trap. A preincubated solution of hPol $\eta$  (130 nM), unlabeled DNA trap D-1 21/41-mer (5  $\mu$ M, Table 1), and 5'-radiolabeled 21-mer/26-mer (20 nM) was mixed with a solution dGTP (0.8 mM) for various times before being quenched with EDTA (0.37 M). The gel image revealed negligible nucleotide incorporation within 33 s.



**Supplementary Table 1.** Kinetic parameters of nucleotide incorporation onto undamaged DNA catalyzed by hPol $\eta$ .

| <b>dNTP</b>                                                                                                                                                            | $K_{d, \text{dNTP}}$<br>( $\mu\text{M}$ ) | $k_p$<br>( $\text{s}^{-1}$ )     | $k_p/K_{d, \text{dNTP}}$<br>( $\mu\text{M}^{-1}\text{s}^{-1}$ ) | <b>Fidelity<sup>a</sup></b> |
|------------------------------------------------------------------------------------------------------------------------------------------------------------------------|-------------------------------------------|----------------------------------|-----------------------------------------------------------------|-----------------------------|
| <i>Template dG (20-mer/26-mer)</i>                                                                                                                                     |                                           |                                  |                                                                 |                             |
| dCTP                                                                                                                                                                   | 85 $\pm$ 11                               | 48 $\pm$ 2                       | 5.6 $\times 10^{-1}$                                            | -                           |
| dATP                                                                                                                                                                   | 350 $\pm$ 36                              | (9.5 $\pm$ 0.4) $\times 10^{-1}$ | 2.7 $\times 10^{-3}$                                            | 4.8 $\times 10^{-3}$        |
| dGTP                                                                                                                                                                   | 37 $\pm$ 8                                | (4.0 $\pm$ 0.2) $\times 10^{-2}$ | 1.1 $\times 10^{-3}$                                            | 2.0 $\times 10^{-3}$        |
| dTTP                                                                                                                                                                   | 494 $\pm$ 70                              | 3.3 $\pm$ 0.2                    | 6.6 $\times 10^{-3}$                                            | 1.2 $\times 10^{-2}$        |
| <i>Template dC (21-mer/26-mer)</i>                                                                                                                                     |                                           |                                  |                                                                 |                             |
| dGTP                                                                                                                                                                   | 46 $\pm$ 8                                | 39 $\pm$ 2                       | 8.4 $\times 10^{-1}$                                            | -                           |
| dATP                                                                                                                                                                   | 242 $\pm$ 25                              | 3.4 $\pm$ 0.1                    | 1.4 $\times 10^{-2}$                                            | 1.7 $\times 10^{-2}$        |
| dCTP                                                                                                                                                                   | 119 $\pm$ 21                              | 2.2 $\pm$ 0.1                    | 1.8 $\times 10^{-2}$                                            | 2.1 $\times 10^{-2}$        |
| dTTP                                                                                                                                                                   | 712 $\pm$ 73                              | 3.3 $\pm$ 0.2                    | 4.6 $\times 10^{-3}$                                            | 5.4 $\times 10^{-3}$        |
| <sup>a</sup> Calculated as $(k_p/K_{d, \text{dNTP}})_{\text{incorrect}} / [(k_p/K_{d, \text{dNTP}})_{\text{correct}} + (k_p/K_{d, \text{dNTP}})_{\text{incorrect}}]$ . |                                           |                                  |                                                                 |                             |
| All given errors were derived from data fitting.                                                                                                                       |                                           |                                  |                                                                 |                             |

**Supplementary Table 2.** Kinetic parameters of nucleotide incorporation onto undamaged DNA catalyzed by hPolk.

| dNTP                               | $K_d, \text{dNTP}$<br>( $\mu\text{M}$ ) | $k_p$<br>( $\text{s}^{-1}$ )   | $k_p/K_d, \text{dNTP}$<br>( $\mu\text{M}^{-1}\text{s}^{-1}$ ) | Fidelity <sup>a</sup>  |
|------------------------------------|-----------------------------------------|--------------------------------|---------------------------------------------------------------|------------------------|
| <i>Template dG (20-mer/26-mer)</i> |                                         |                                |                                                               |                        |
| dCTP                               | 46 ± 6                                  | 1.7 ± 0.1                      | 3.7 × 10 <sup>-2</sup>                                        | -                      |
| dATP                               | 539 ± 71                                | (3.2 ± 0.2) × 10 <sup>-1</sup> | 6.0 × 10 <sup>-4</sup>                                        | 1.6 × 10 <sup>-2</sup> |
| dGTP                               | 388 ± 29                                | (4.1 ± 0.1) × 10 <sup>-1</sup> | 1.1 × 10 <sup>-3</sup>                                        | 2.9 × 10 <sup>-2</sup> |
| dTTP                               | 693 ± 66                                | (5.5 ± 0.3) × 10 <sup>-1</sup> | 8.0 × 10 <sup>-4</sup>                                        | 2.1 × 10 <sup>-2</sup> |
| <i>Template dC (21-mer/26-mer)</i> |                                         |                                |                                                               |                        |
| dGTP                               | 87 ± 9                                  | (9.9 ± 0.3) × 10 <sup>-1</sup> | 1.1 × 10 <sup>-2</sup>                                        | -                      |
| dATP                               | 596 ± 121                               | (2.4 ± 0.2) × 10 <sup>-2</sup> | 4.0 × 10 <sup>-5</sup>                                        | 3.6 × 10 <sup>-3</sup> |
| dCTP                               | 1343 ± 474                              | (9.1 ± 2.0) × 10 <sup>-2</sup> | 6.8 × 10 <sup>-5</sup>                                        | 6.1 × 10 <sup>-3</sup> |
| dTTP                               | 645 ± 84                                | (2.5 ± 0.2) × 10 <sup>-2</sup> | 3.9 × 10 <sup>-5</sup>                                        | 3.5 × 10 <sup>-3</sup> |

<sup>a</sup>Calculated as  $(k_p/K_d, \text{dNTP})_{\text{incorrect}} / [(k_p/K_d, \text{dNTP})_{\text{correct}} + (k_p/K_d, \text{dNTP})_{\text{incorrect}}]$ .

All given errors were derived from data fitting.

**Supplementary Table 3.** Kinetic parameters of nucleotide incorporation onto undamaged DNA catalyzed by hPol.

| <b>dNTP</b>                        | <b><math>K_d</math>, dNTP<br/>(<math>\mu\text{M}</math>)</b> | <b><math>k_p</math><br/>(<math>\text{s}^{-1}</math>)</b> | <b><math>k_p/K_d</math>, dNTP<br/>(<math>\mu\text{M}^{-1}\text{s}^{-1}</math>)</b> | <b>Fidelity<sup>a</sup></b> |
|------------------------------------|--------------------------------------------------------------|----------------------------------------------------------|------------------------------------------------------------------------------------|-----------------------------|
| <i>Template dG (20-mer/26-mer)</i> |                                                              |                                                          |                                                                                    |                             |
| dCTP                               | 133 ± 8                                                      | (2.1 ± 0.1)×10 <sup>-1</sup>                             | 1.6×10 <sup>-3</sup>                                                               | -                           |
| dATP                               | 667 ± 105                                                    | (1.0 ± 0.1)×10 <sup>-2</sup>                             | 1.5×10 <sup>-5</sup>                                                               | 9.3×10 <sup>-3</sup>        |
| dGTP                               | 323 ± 25                                                     | (5.3 ± 0.2)×10 <sup>-3</sup>                             | 1.6×10 <sup>-5</sup>                                                               | 9.9×10 <sup>-3</sup>        |
| dTTP                               | 447 ± 35                                                     | (9.1 ± 0.3)×10 <sup>-2</sup>                             | 2.0×10 <sup>-4</sup>                                                               | 1.1×10 <sup>-1</sup>        |
| <i>Template dC (21-mer/26-mer)</i> |                                                              |                                                          |                                                                                    |                             |
| dGTP                               | 117 ± 7                                                      | (19 ± 0.4)×10 <sup>-2</sup>                              | 1.6×10 <sup>-3</sup>                                                               | -                           |
| dATP                               | ND                                                           | ND                                                       | -                                                                                  | -                           |
| dCTP                               | ND                                                           | ND                                                       | -                                                                                  | -                           |
| dTTP                               | 783 ± 44                                                     | (13 ± 0.4)×10 <sup>-2</sup>                              | 1.7×10 <sup>-4</sup>                                                               | 9.6×10 <sup>-2</sup>        |

<sup>a</sup>Calculated as  $(k_p/K_d)_{\text{incorrect}} / [(k_p/K_d)_{\text{correct}} + (k_p/K_d)_{\text{incorrect}}]$ .

ND denoted 'not determined'.

All given errors were derived from data fitting.

**Supplementary Table 4.** Kinetic parameters of nucleotide incorporation onto undamaged DNA catalyzed by hRev1.

| <b>dNTP</b>                        | $K_{d, \text{dNTP}}$<br>( $\mu\text{M}$ ) | $k_p$<br>( $\text{s}^{-1}$ )   | $k_p/K_{d, \text{dNTP}}$<br>( $\mu\text{M}^{-1}\text{s}^{-1}$ ) | <b>Fidelity<sup>a</sup></b> |
|------------------------------------|-------------------------------------------|--------------------------------|-----------------------------------------------------------------|-----------------------------|
| <i>Template dG (20-mer/26-mer)</i> |                                           |                                |                                                                 |                             |
| dCTP                               | $5.4 \pm 1.2$                             | $(7.8 \pm 0.7) \times 10^{-1}$ | $1.4 \times 10^{-1}$                                            | -                           |
| dTTP                               | $80 \pm 14$                               | $(2.1 \pm 0.1) \times 10^{-1}$ | $2.6 \times 10^{-2}$                                            | $1.6 \times 10^{-1}$        |
| dATP                               | $99 \pm 17$                               | $(70 \pm 0.4) \times 10^{-4}$  | $7.1 \times 10^{-5}$                                            | $5.1 \times 10^{-4}$        |
| dGTP                               | $256 \pm 14$                              | $(14 \pm 0.3) \times 10^{-1}$  | $5.3 \times 10^{-3}$                                            | $3.6 \times 10^{-2}$        |

<sup>a</sup>Calculated as  $(k_p/K_{d, \text{dNTP}})_{\text{incorrect}} / [(k_p/K_{d, \text{dNTP}})_{\text{correct}} + (k_p/K_{d, \text{dNTP}})_{\text{incorrect}}]$ .

All given errors were derived from data fitting.

**Supplementary Table 5.** Biphasic kinetic parameters of correct nucleotide incorporations catalyzed by hPol $\eta$ .

| <b>DNA Substrate<br/>(Primer/Template)</b> | <b>A<sub>1</sub><br/>(nM)</b> | <b>k<sub>1</sub><br/>(s<sup>-1</sup>)</b> | <b>A<sub>2</sub><br/>(nM)</b> | <b>k<sub>2</sub><br/>(s<sup>-1</sup>)</b> |
|--------------------------------------------|-------------------------------|-------------------------------------------|-------------------------------|-------------------------------------------|
| 21-mer/26-mer                              | 7.8 ± 0.3 (39%) <sup>a</sup>  | 72 ± 4.9                                  | 9.5 ± 0.3 (47%)               | 4.4 ± 0.5                                 |
| 21-mer/26-mer-dG <sup>AP</sup>             | 2.9 ± 0.1 (14%)               | 11 ± 1.2                                  | 1.1 ± 0.2 (5.3%)              | 0.2 ± 0.02                                |

<sup>a</sup>Calculated as (reaction amplitude/20 nM)×100.

All given errors were derived from data fitting.
